# Supplementary material
Source: PubMed Central journal article supplement (PMC3191019)
Supplement: supp_M111.261370_jbc.M111.261370-1.pdf [file supp_M111.261370_jbc.M111.261370-1.pdf]

**Supplemental Data**

**THE STRUCTURAL BASIS OF MULTIFUNCTIONALITY IN A B<sub>12</sub> PROCESSING  
ENZYME**

Markos Koutmos, Carmen Gherasim, Janet L Smith and Ruma Banerjee

H.sapiens

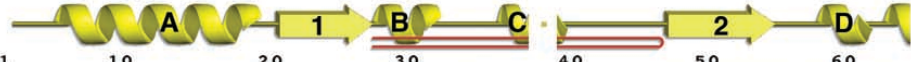

Table of amino acid sequences for H.sapiens and other species (P.roglodytes, M.mulatta, E.caballus, B.taurus, R.norvegicus, M.musculus, M.domestica, G.gallus, L.salmonis, C.clemensi, X.laevus, S.salar, T.nigroviridis, D.terio, C.intestinalis, B.floridiae, N.vectensis, S.purpuratus, I.scapularis, C.elegans) corresponding to the domain structure diagram above.

H.sapiens

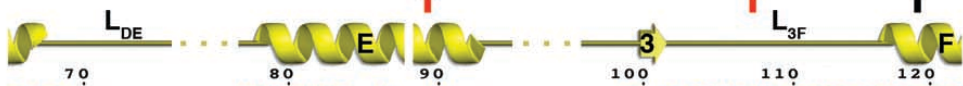

Table of amino acid sequences for H.sapiens and other species corresponding to the domain structure diagram above. Includes asterisks and arrows indicating specific residues or motifs.

H.sapiens

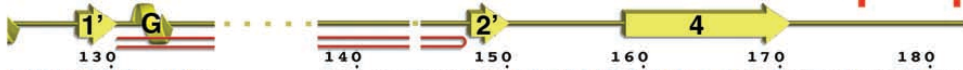

Table of amino acid sequences for H.sapiens and other species corresponding to the domain structure diagram above. Includes asterisks and arrows indicating specific residues or motifs.



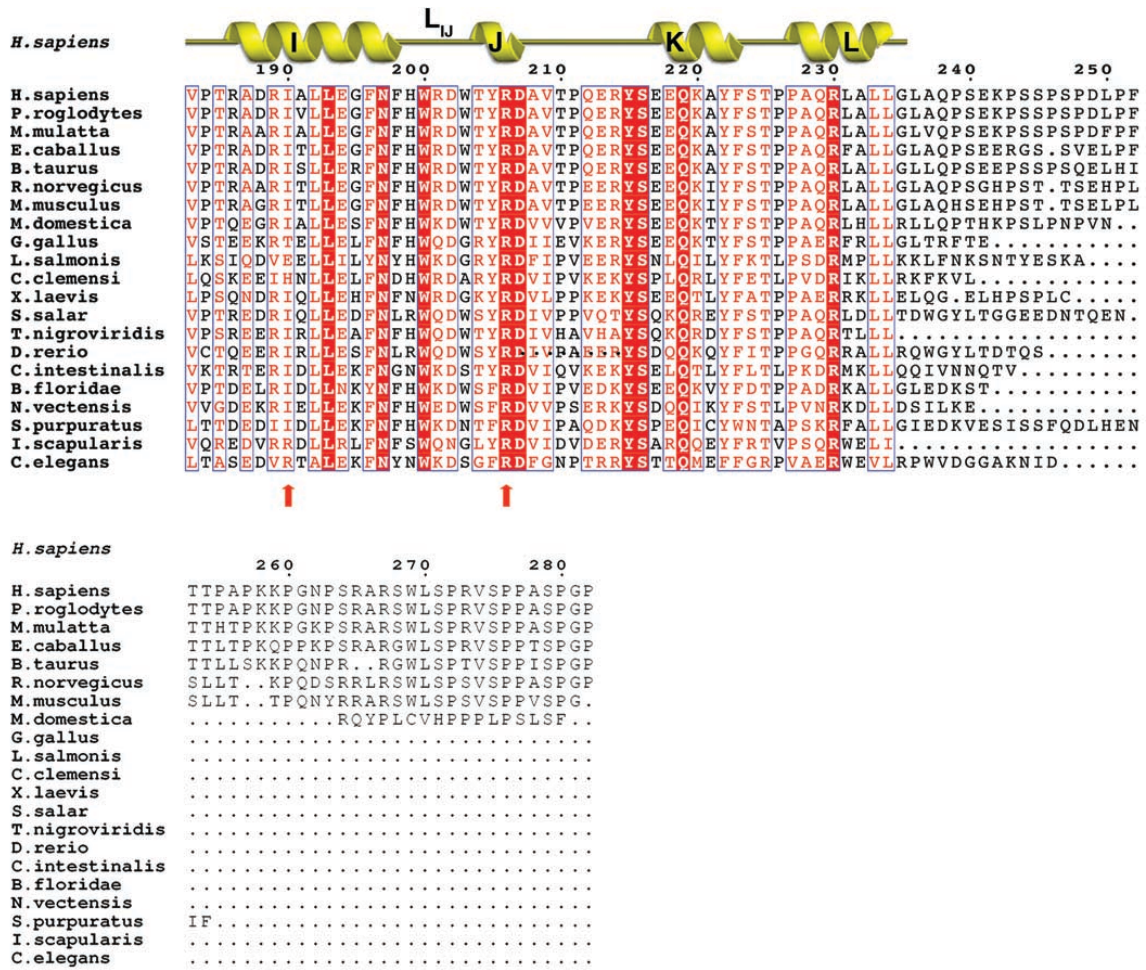

**Figure S1.** Sequence alignment of CblCs from various organisms. The secondary structure displayed is based on the apo-t-CblC structure. Red arrows indicate patient mutations related to either Cbl binding or protein structural integrity. Green asterisks indicate side chains that interact with Cbl, and blue asterisks indicate backbone interactions with Cbl. Beta hairpins are indicated with red loops.

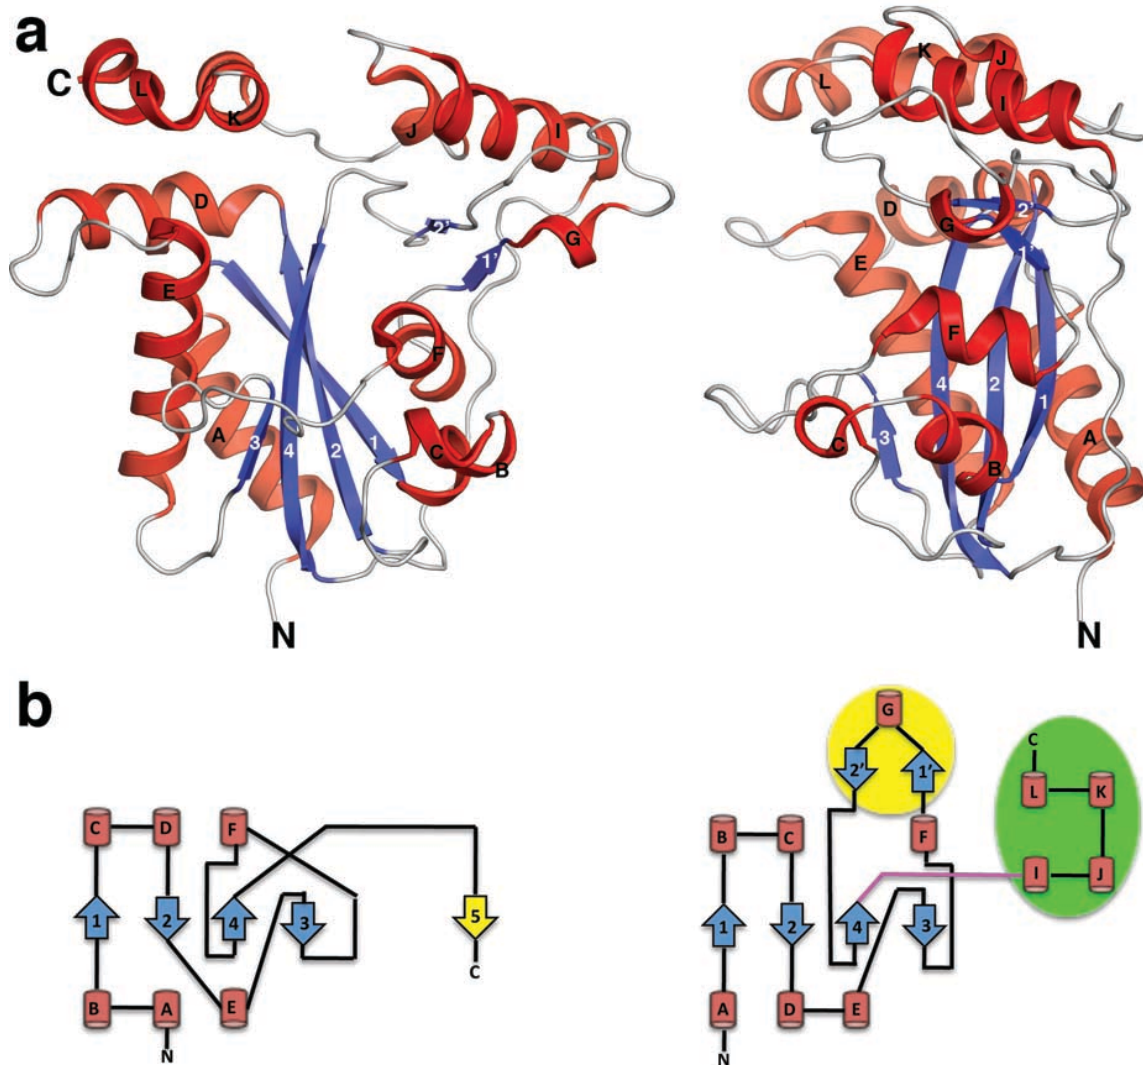

**Figure S2.** Comparison of CblC and BluB. (a) Two views of t-CblC. (b) Topology diagram of BluB (left) and CblC (right). In (a) and (b) the  $\alpha$ -helices are shown in red and  $\beta$ -strands in blue. Secondary structure features highlighted in yellow and green circles correspond to significant differences/additions to CblC as compared to flavin reductases such as BluB. These structural features highlighted with green and yellow circles are represented in the same coloring scheme in the main text Figs. 2c and d.

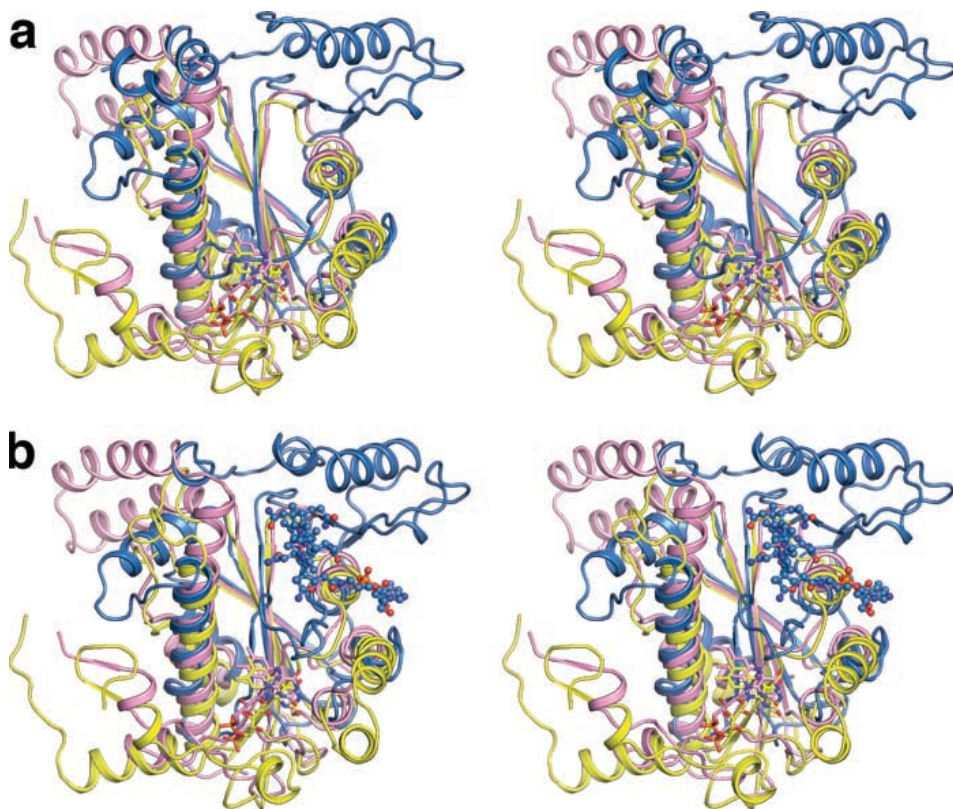

**Figure S3.** Structural superposition of CblC, BluB and IYD. Superposition in stereo of a BluB monomer (yellow), a IYD monomer (pink), and (a) apo-t-CblC and (b) MeCbl•t-CblC (blue) are shown. The FMN cofactors for BluB and IYD are shown in stick representation whereas the MeCbl substrate is shown in ball and stick.



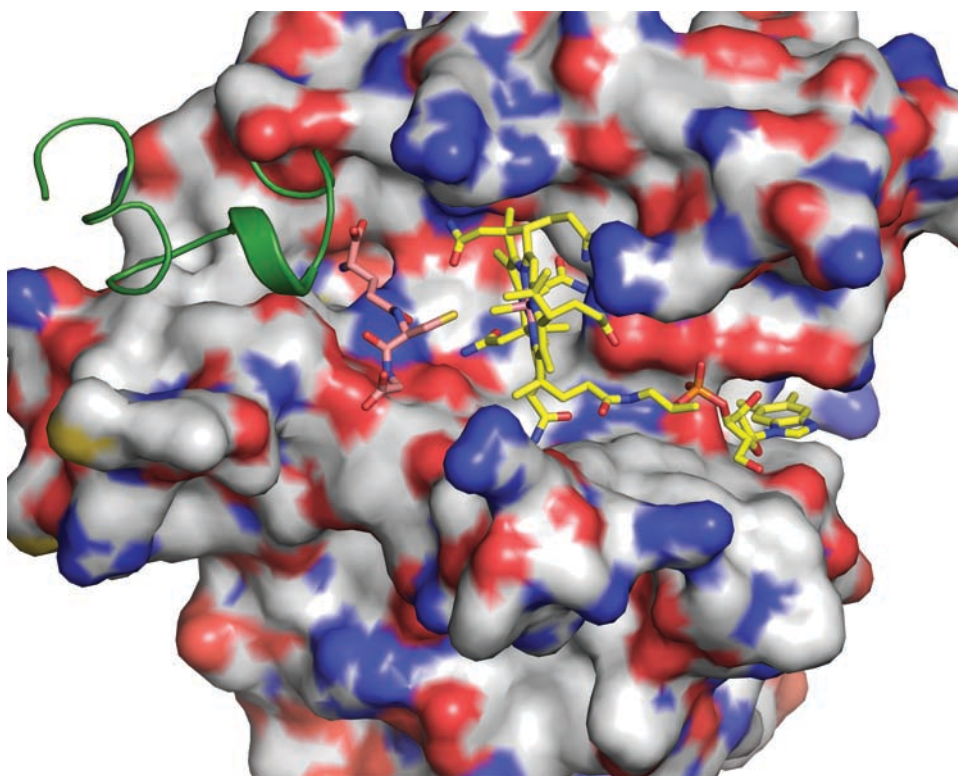

**Figure S4.** Space filling model of t-CbIC•MeCbl. MeCbl is shown in yellow sticks, and modeled GSH is in pink sticks. The flexible C-terminal region (residues 225-238) is displayed in green as a cartoon.

**Table S1.** MeCbl-CblC contacts.

|             | <b>MeCbl</b> | <b>Protein</b> | <b>Distance (Å)</b> |
|-------------|--------------|----------------|---------------------|
| <b>Ring</b> | O28          | I160 N         | 2.9                 |
|             | N29          | D104 OD2       | 2.9                 |
|             | N29          | I160 O         | 3.0                 |
|             | N33          | C149 O         | 3.0                 |
|             | O34          | C149 N         | 2.8                 |
|             | O34          | Q118 NE2       | 2.9                 |
|             | N45          | S146 OH        | 3.1                 |
|             | N62          | D104 O         | 2.9                 |
|             | N62          | I115 O         | 2.8                 |
|             | O63          | A117 N         | 3.0                 |
| <b>Tail</b> | O4           | Y129 OH        | 2.7                 |
|             | O5           | Y129 OH        | 3.5                 |
|             | O7R          | Q131 NE2       | 2.6                 |
